# Supplementary material for: CXCL12/CXCR4-Mediated Procollagen Secretion Is Coupled To Cullin-RING Ubiquitin Ligase Activation
Source: PubMed Central journal article supplement (PMC5823879; doi:10.1038/s41598-018-21506-7), 2018-02-22

## **CXCL12/CXCR4-Mediated Procollagen Secretion Is Coupled To**

### **Cullin-RING Ubiquitin Ligase Activation**

Susan Patalano<sup>1,2</sup>, José Rodríguez-Nieves<sup>2</sup>, Cory Colaneri<sup>1</sup>, Justin Cotellessa<sup>1,2</sup>, Diego Almanza<sup>1,2</sup>, Alisa Zhilin-Roth<sup>1,2</sup>,

Todd Riley<sup>1</sup>, Jill Macoska<sup>1,2</sup>

<sup>1</sup>Department of Biology, University of Massachusetts Boston, <sup>2</sup>Center for Personalized Cancer Therapy, University of

Massachusetts Boston

**Supplementary File 2**

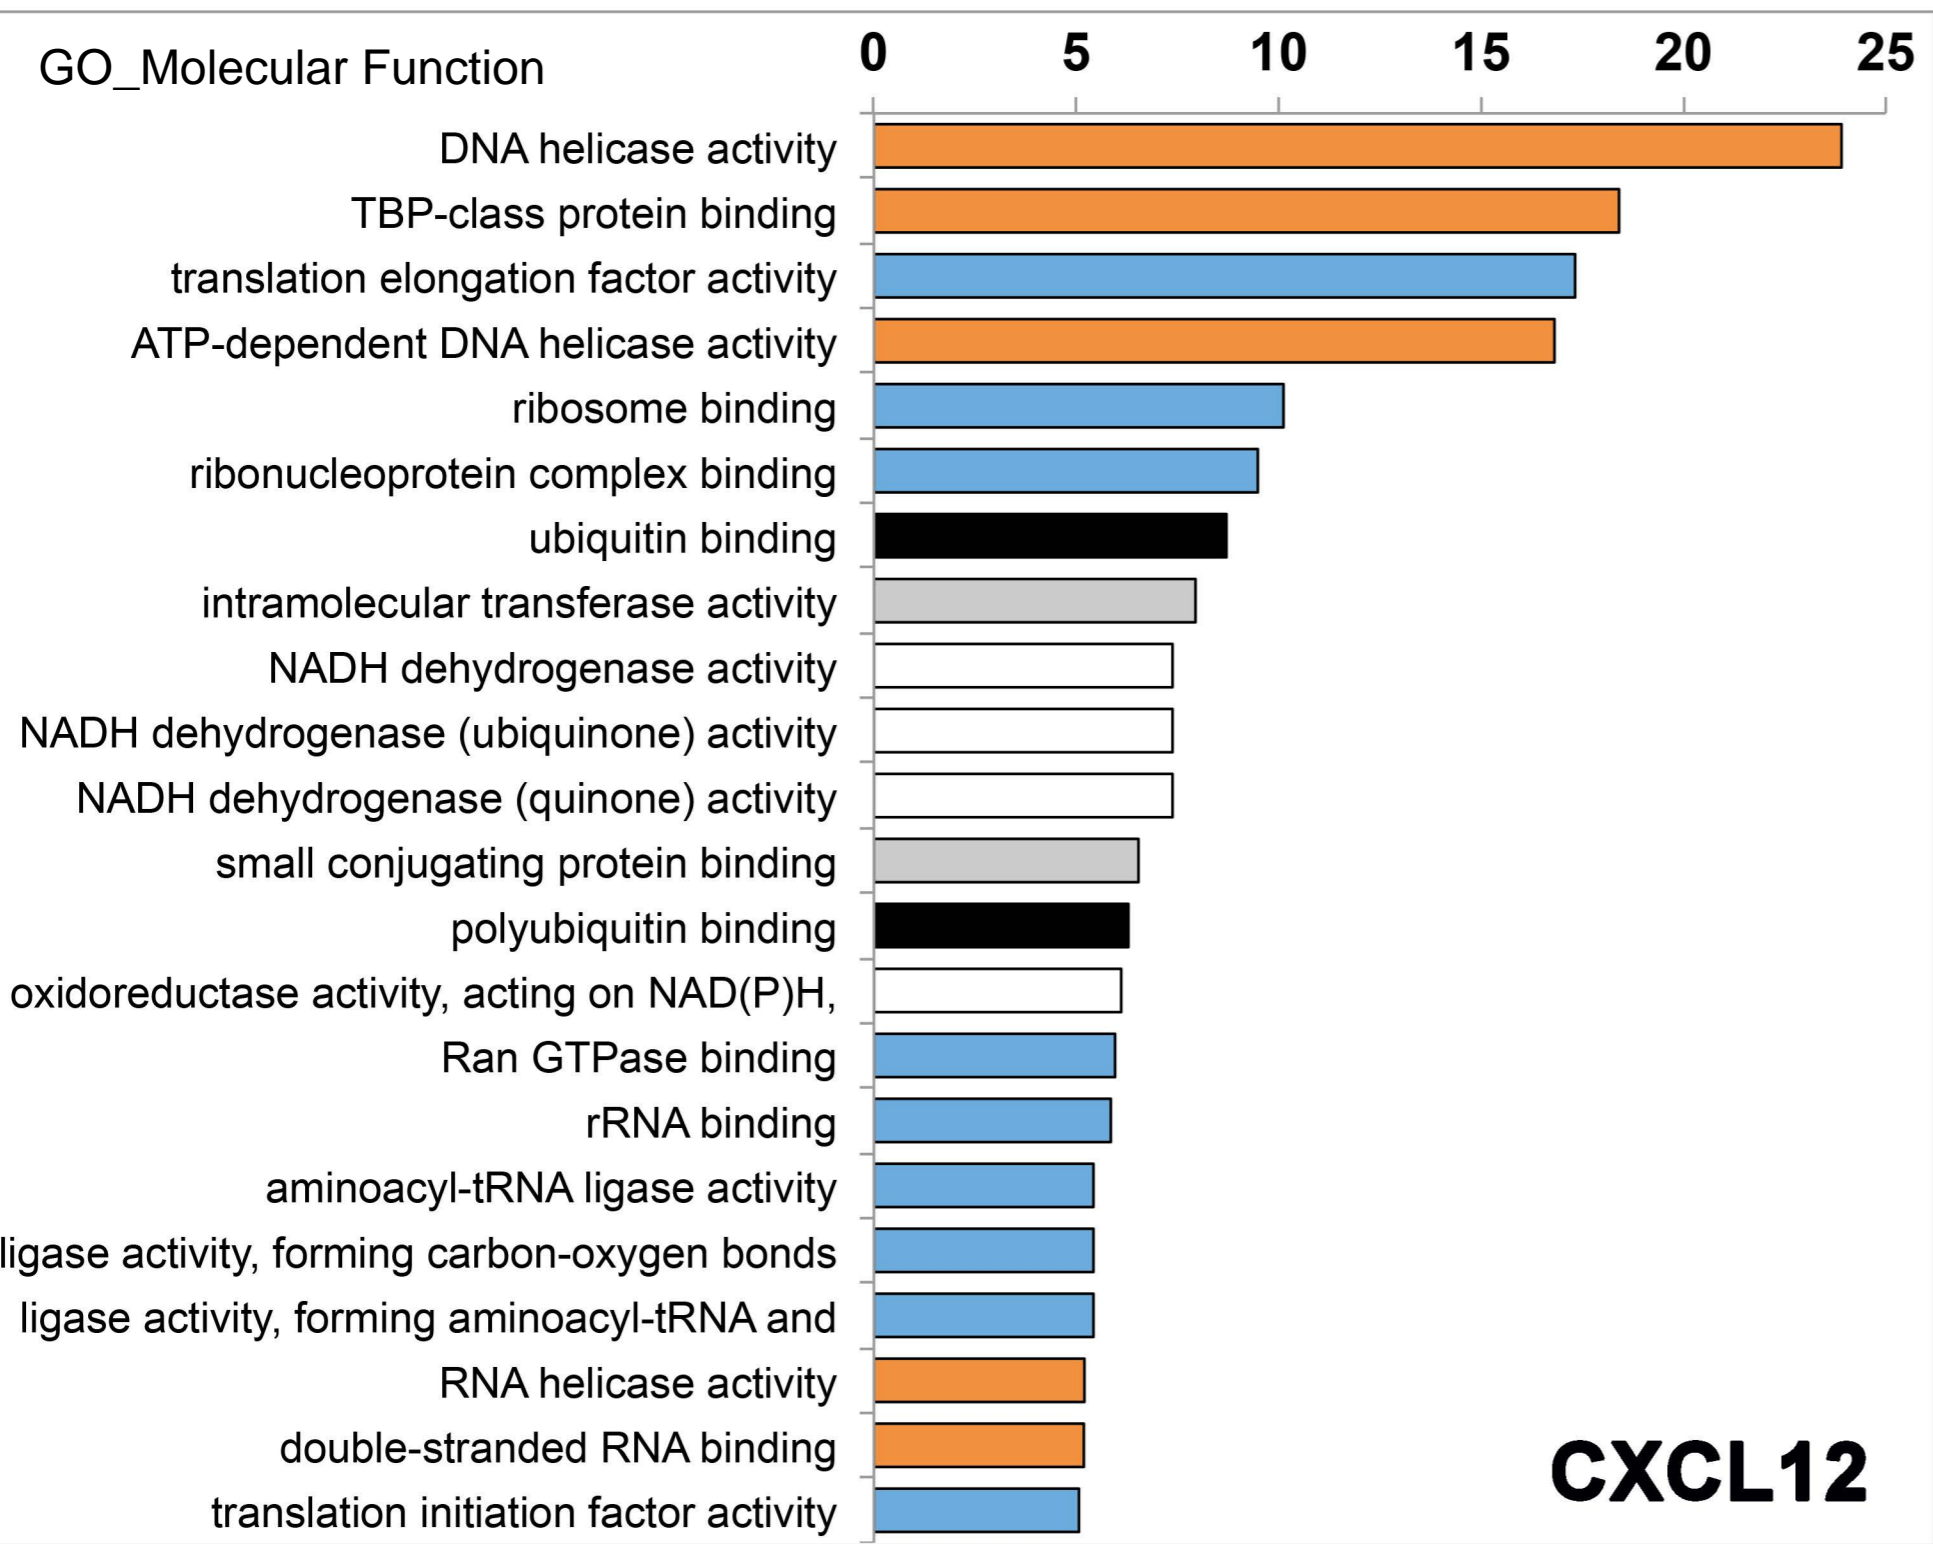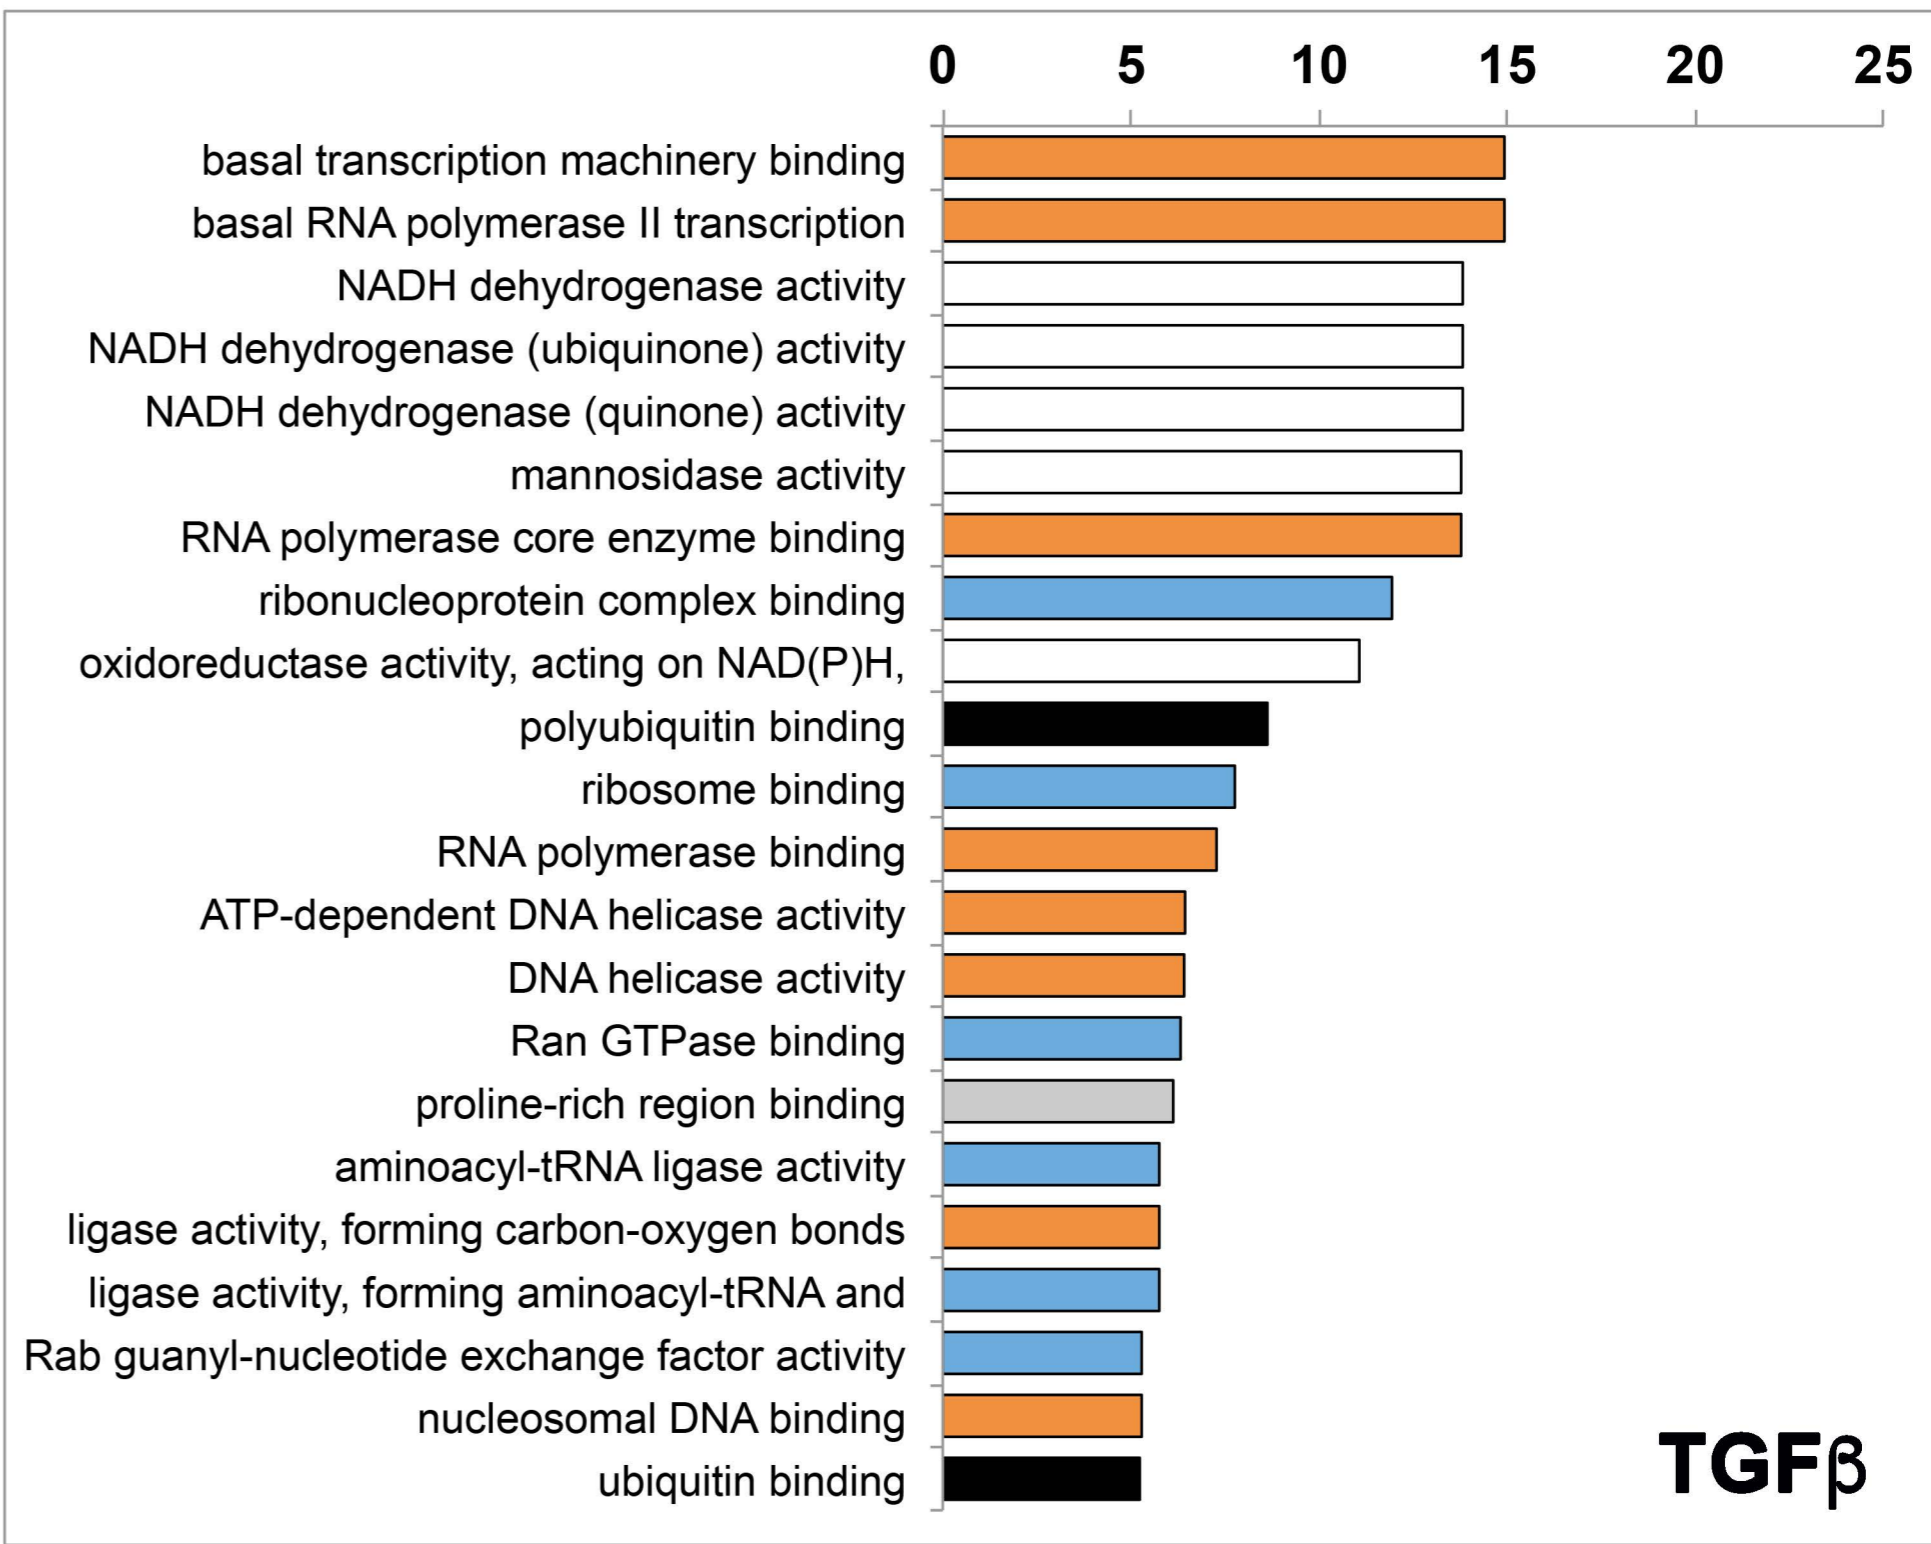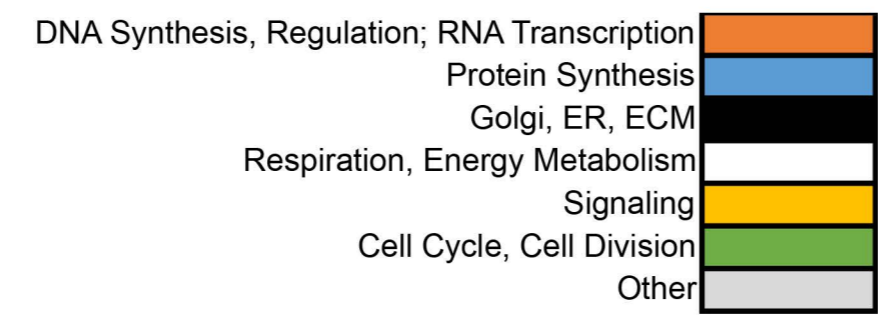

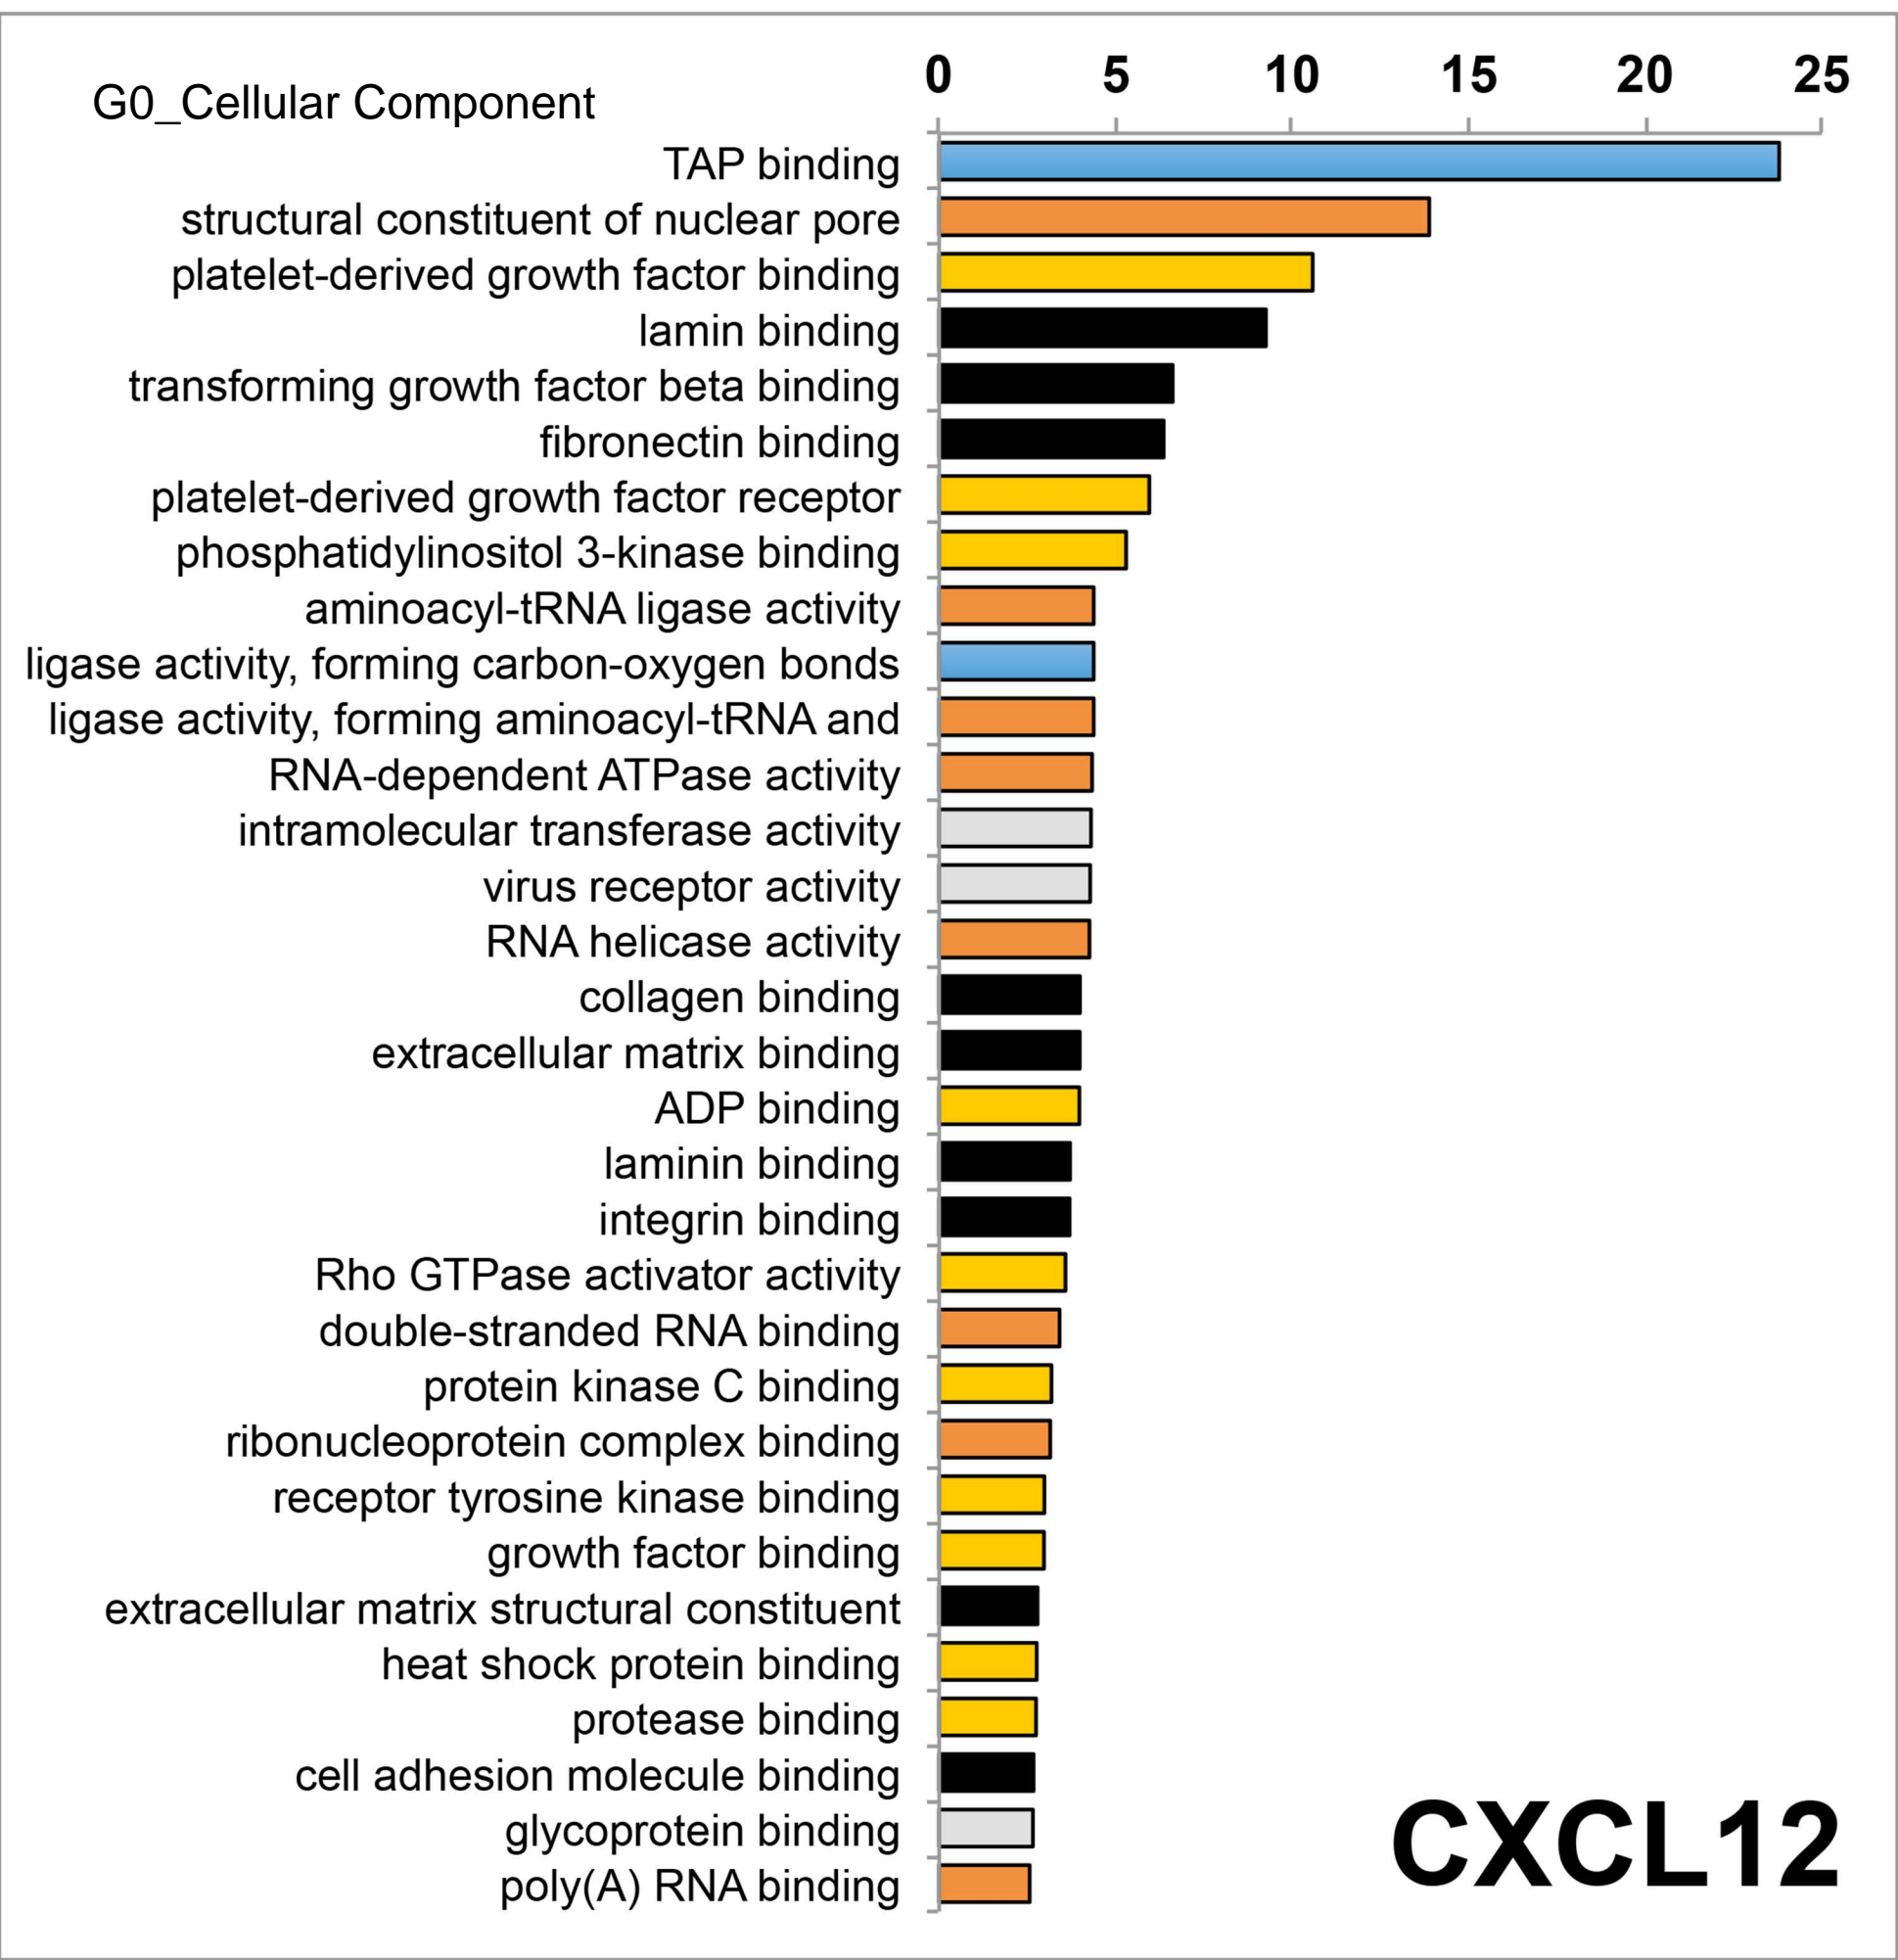

**CXCL12**

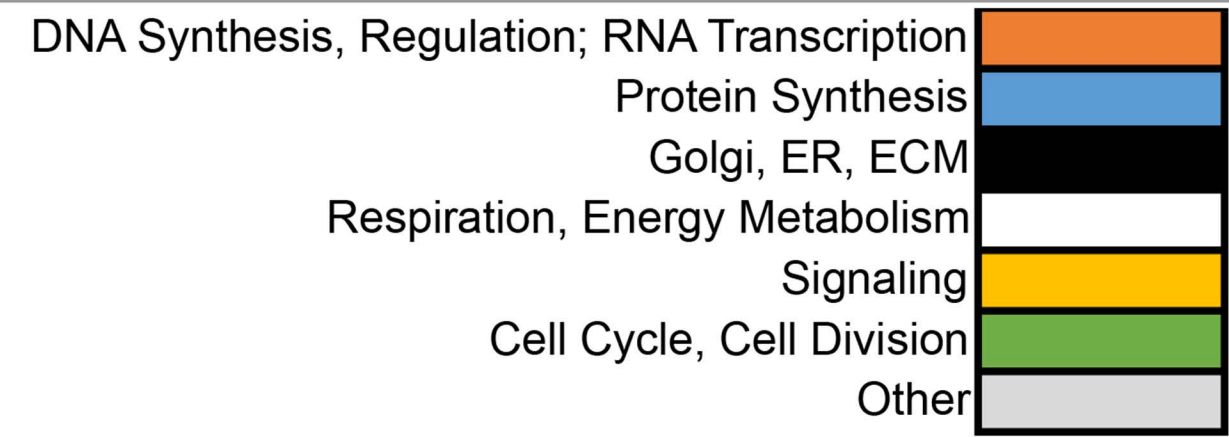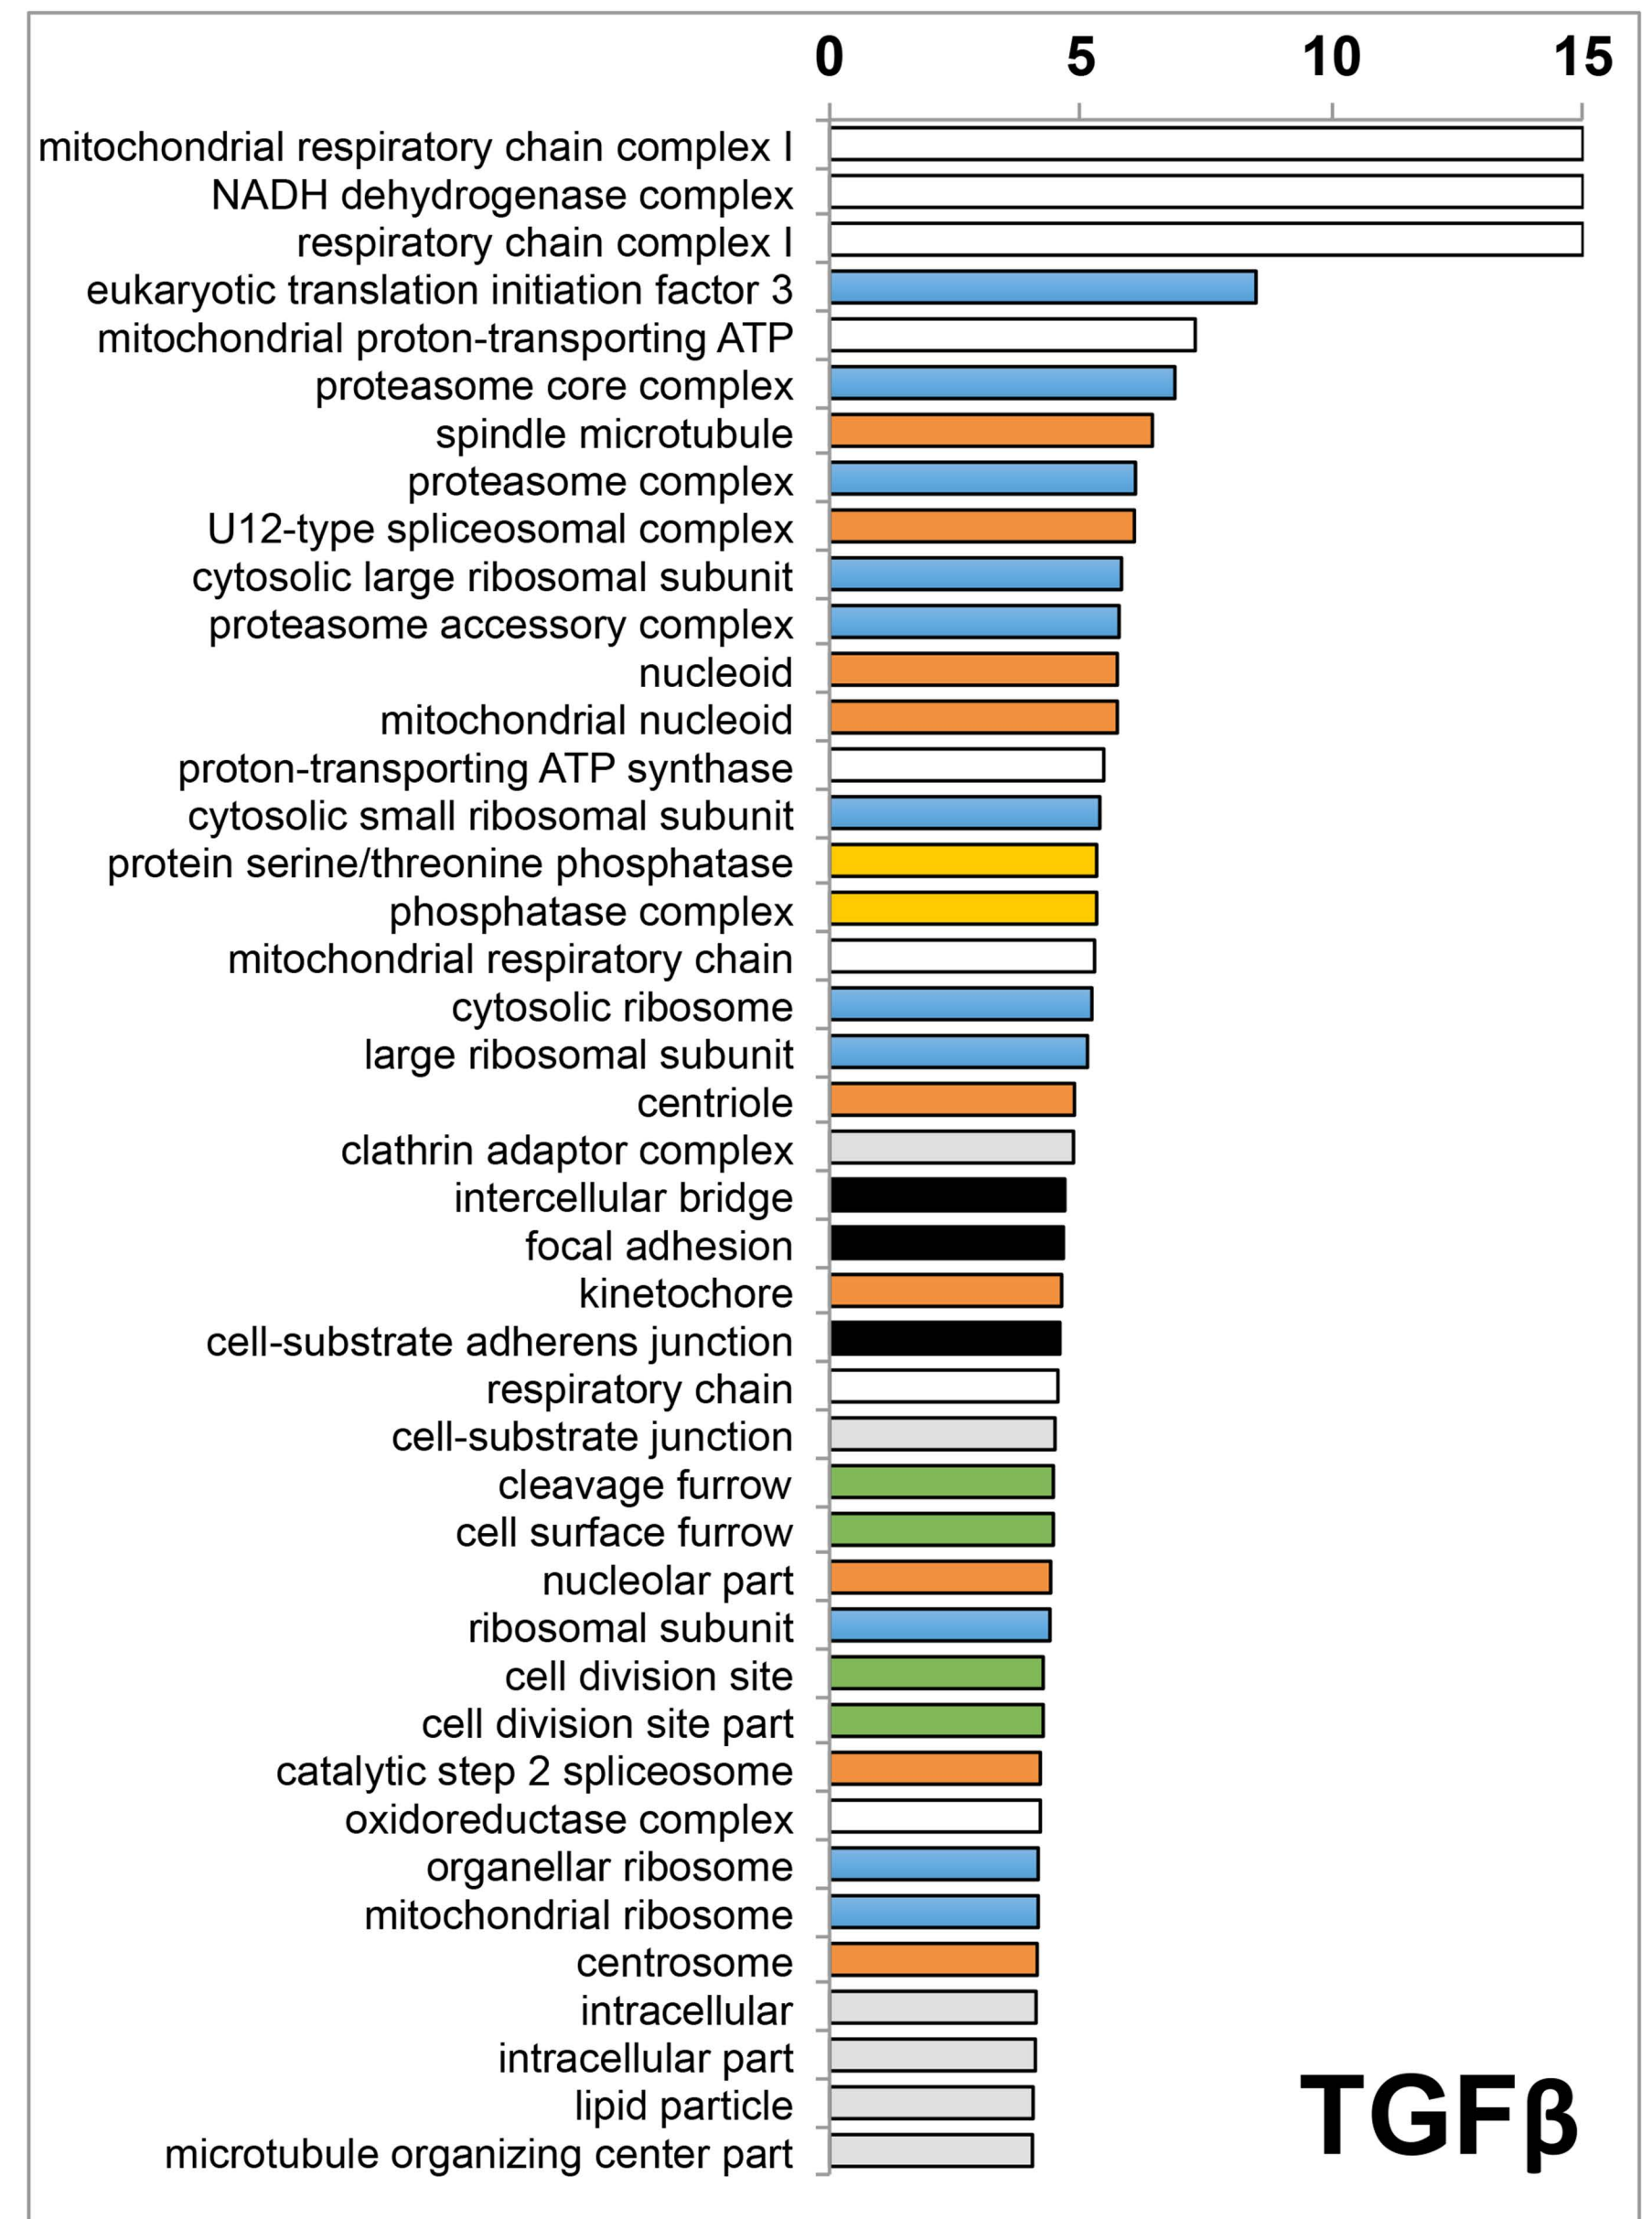

**TGFβ**

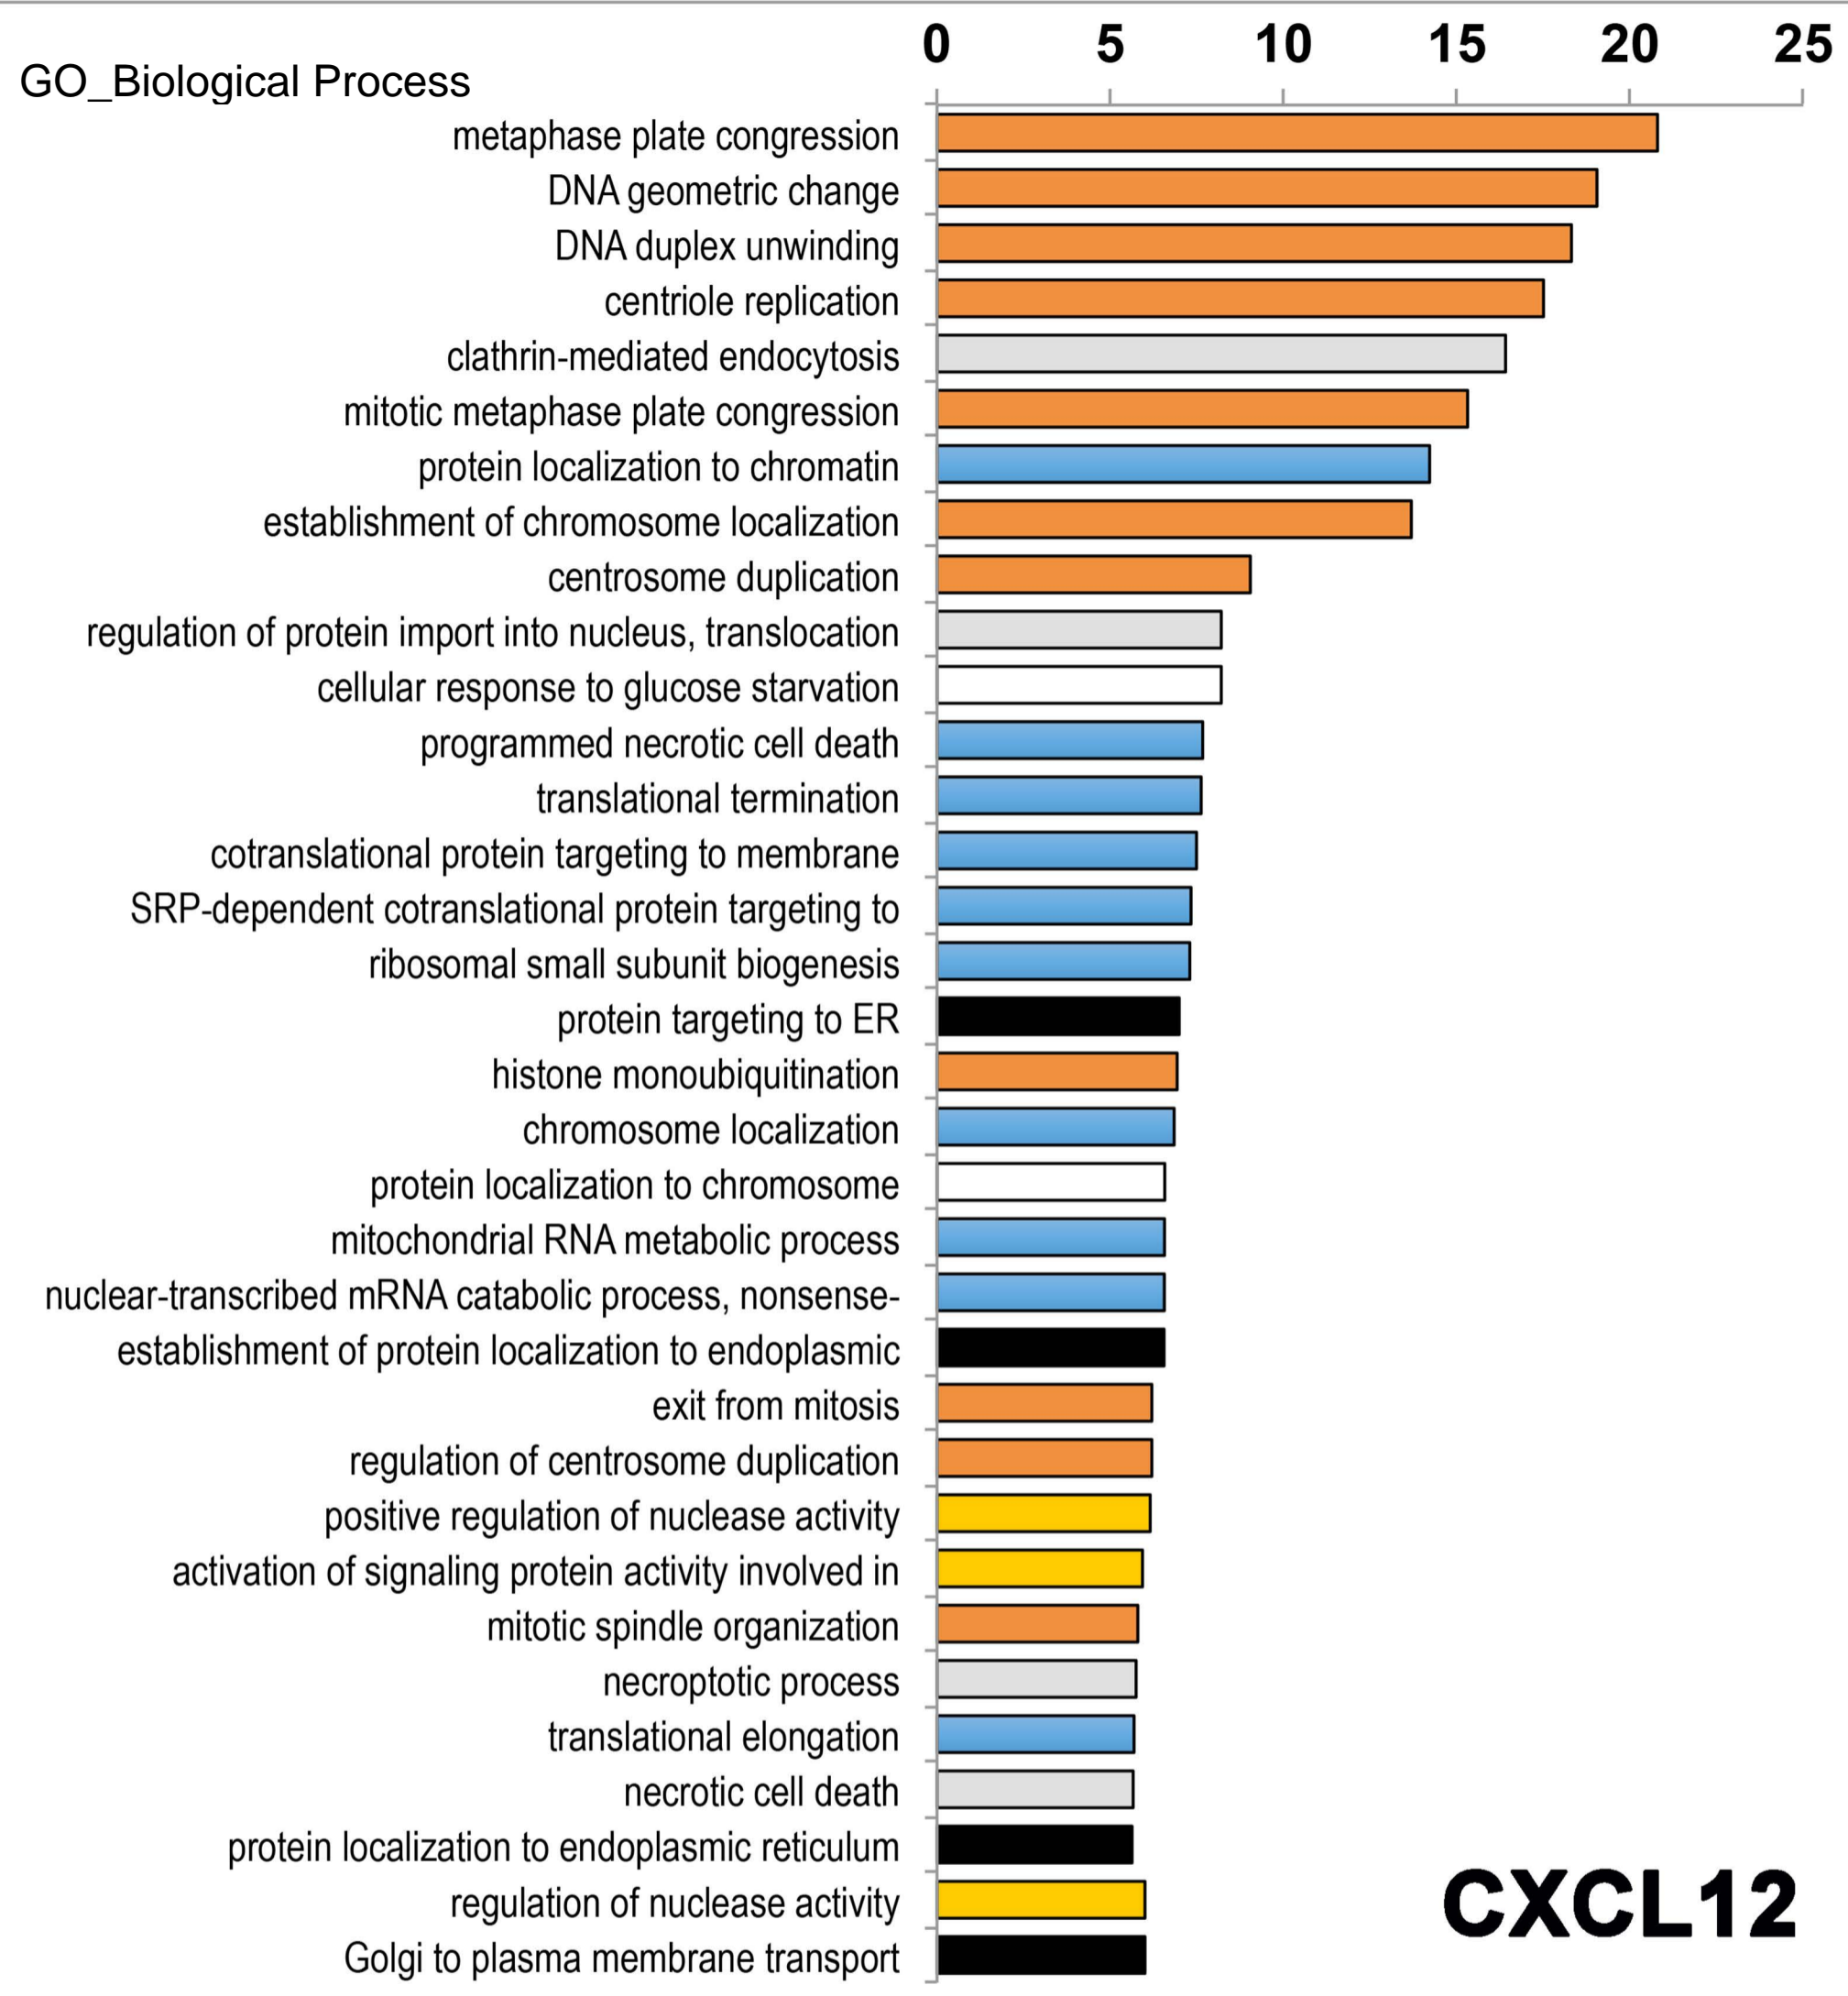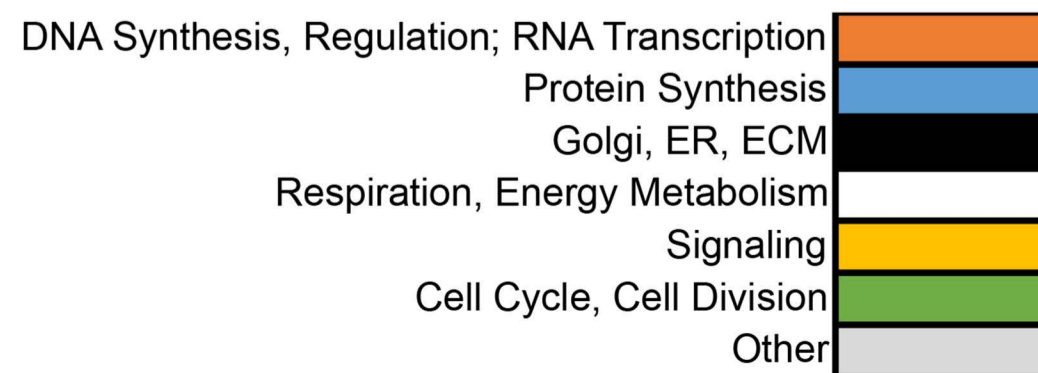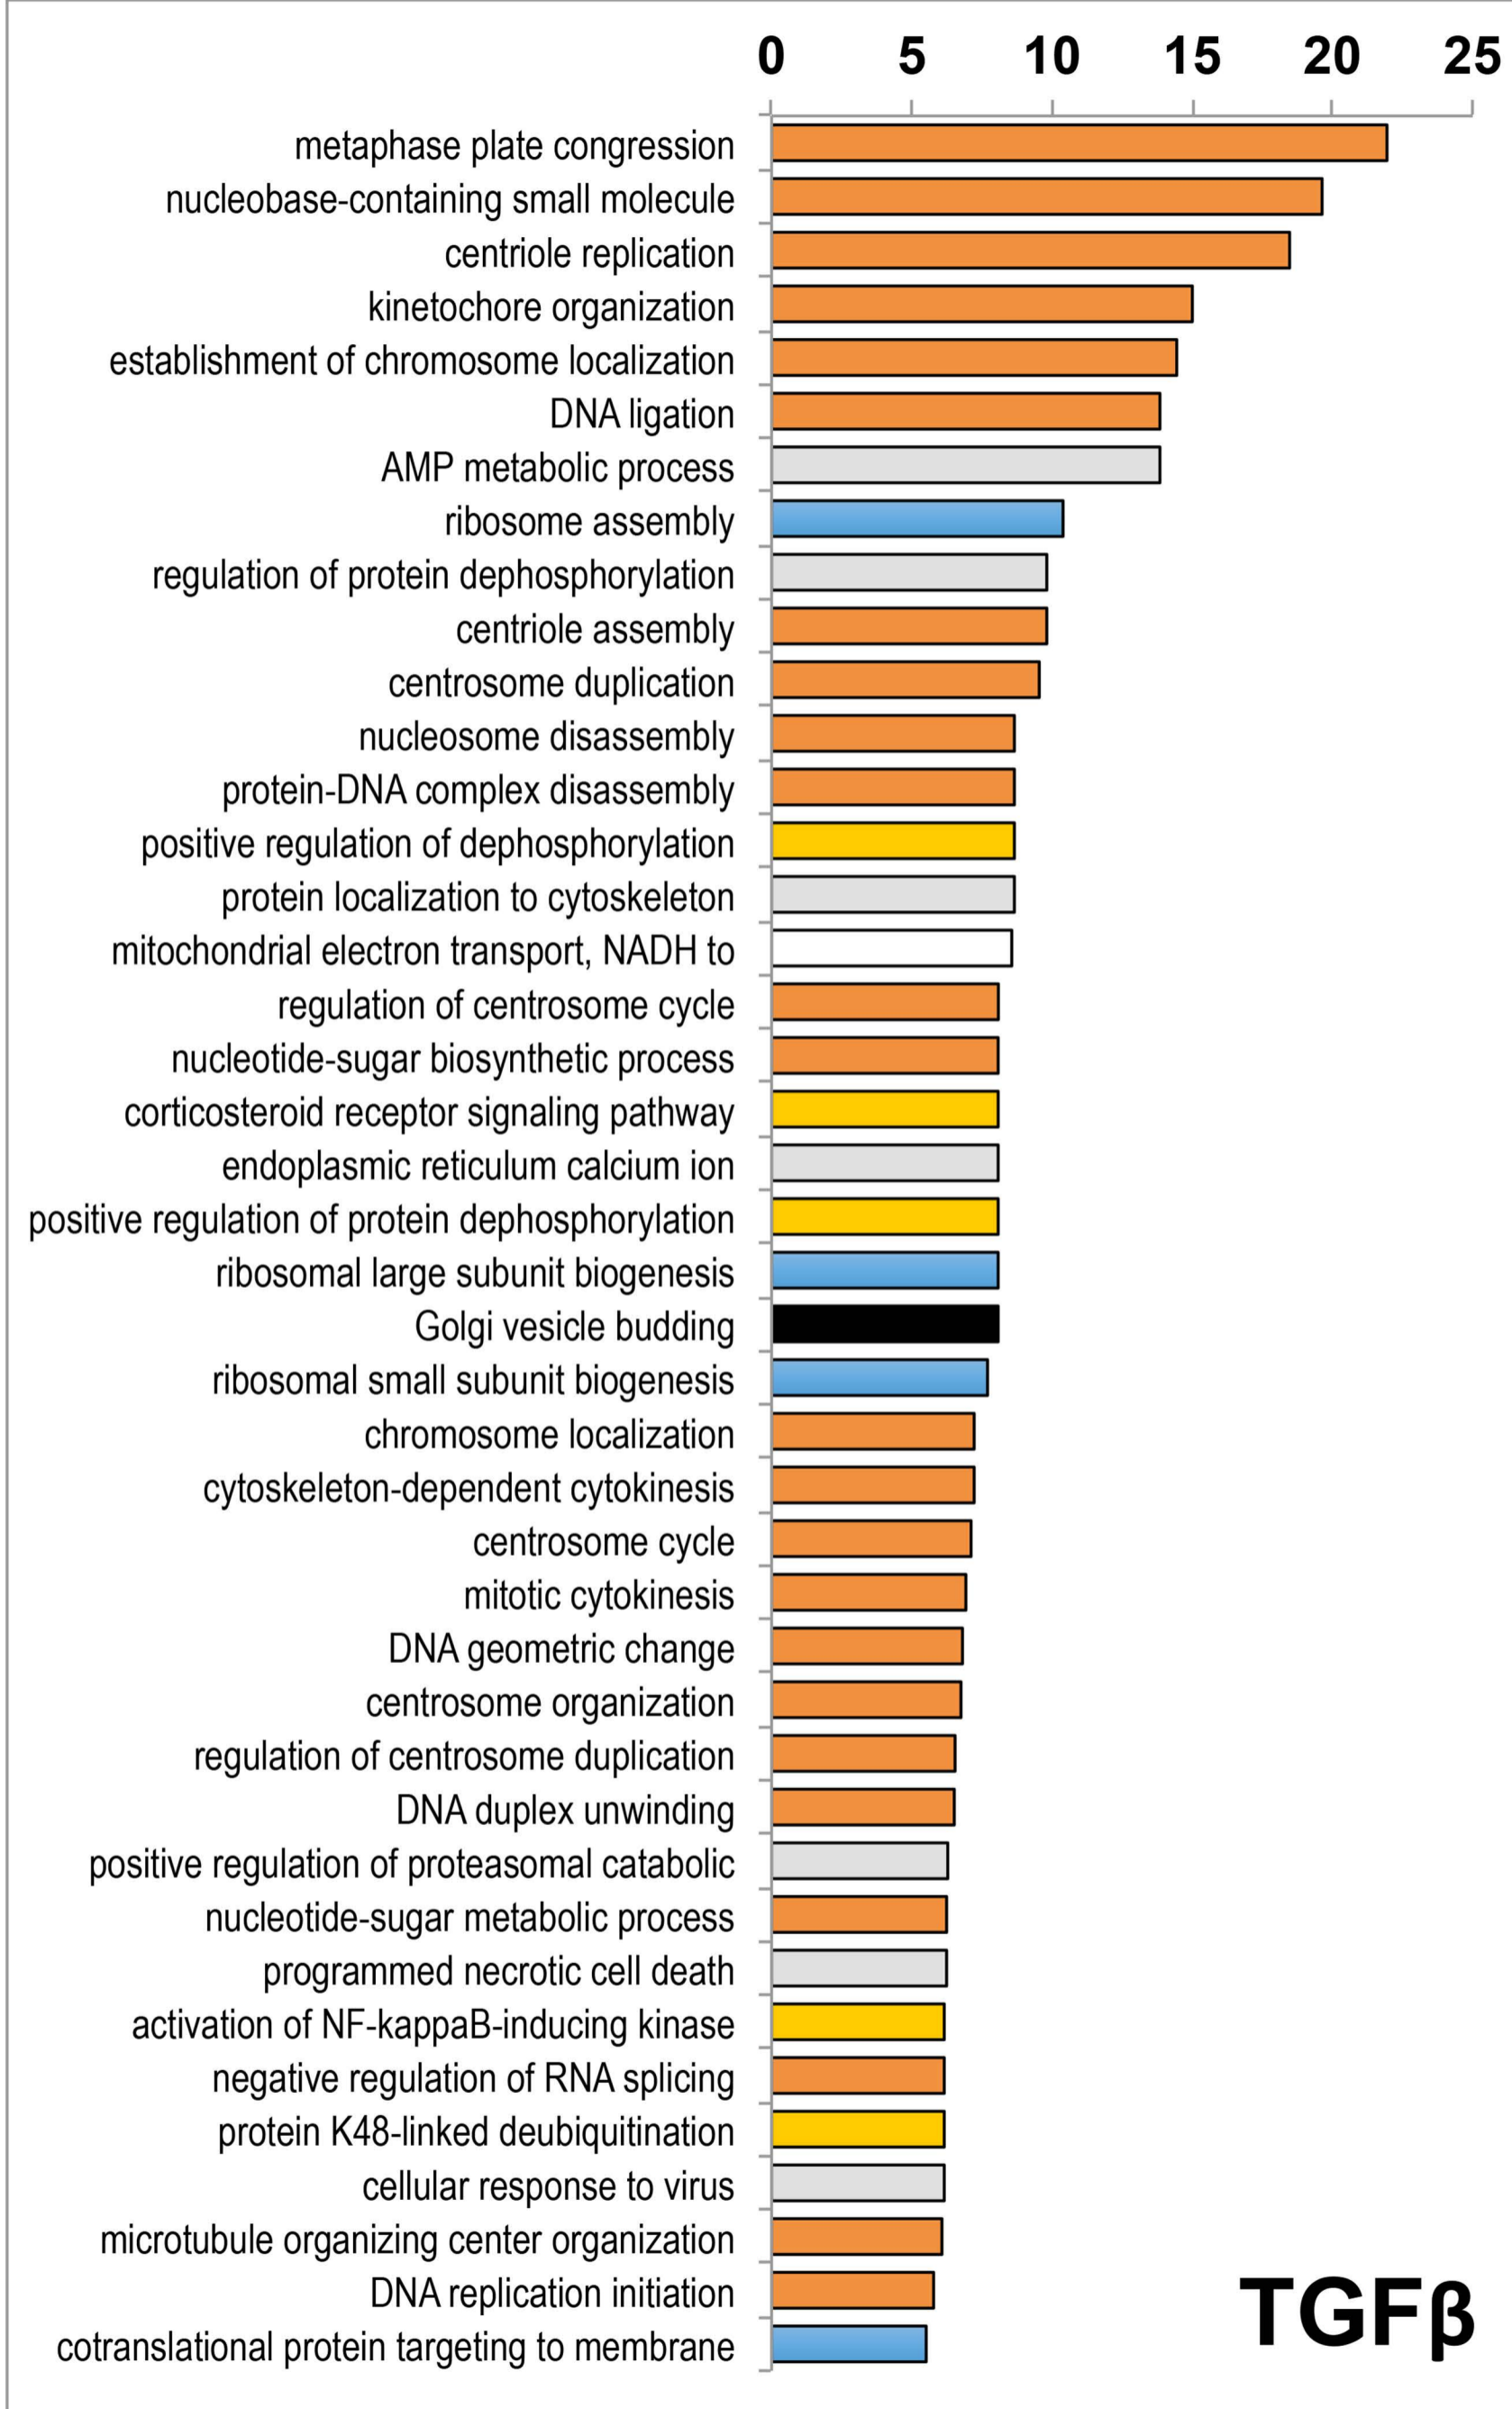

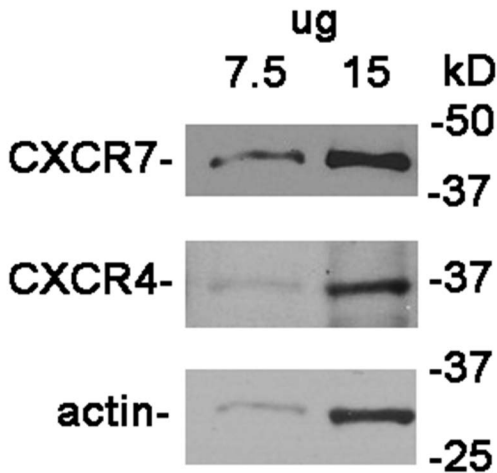

Supplement: 41598_2018_21506_MOESM1_ESM.pdf [file 41598_2018_21506_MOESM1_ESM.pdf]
